# Supplementary material for: Development of a primary care pandemic plan informed by in-depth policy analysis and interviews with family physicians across Canada during COVID-19: a qualitative case study protocol
Source: PubMed Central journal article supplement — BMJ Open. 2021 Jul 22;11(7):e048209. doi: 10.1136/bmjopen-2020-048209 (PMC8300554; doi:10.1136/bmjopen-2020-048209), 2021-07-22
Supplement: bmjopen-2020-048209.draft_revisions.pdf [file bmjopen-2020-048209.draft_revisions.pdf]

# BMJ Open

BMJ Open is committed to open peer review. As part of this commitment we make the peer review history of every article we publish publicly available.

When an article is published we post the peer reviewers' comments and the authors' responses online. We also post the versions of the paper that were used during peer review. These are the versions that the peer review comments apply to.

The versions of the paper that follow are the versions that were submitted during the peer review process. They are not the versions of record or the final published versions. They should not be cited or distributed as the published version of this manuscript.

BMJ Open is an open access journal and the full, final, typeset and author-corrected version of record of the manuscript is available on our site with no access controls, subscription charges or pay-per-view fees (<http://bmjopen.bmj.com>).

If you have any questions on BMJ Open's open peer review process please email [info.bmjopen@bmj.com](mailto:info.bmjopen@bmj.com)

# BMJ Open

## Protocol for the Development of a Primary Care Pandemic Plan Informed by In-depth Policy Analysis and Qualitative Case Studies with Family Physicians Across Canada during COVID-19

|                               |                                                                                                                                                                                                                                                                                                                                                                                                                                                                                                                                                                                                                                                                                                                                                                                                                                                                                                                                                                                                                                                                                                                                                                                                                                                                                                                                                                                                                                                                                                                                                                                                                                                                                                                                                                                                                                                                                                                                                                                                                                                                                                                                                                                                                                                                                                                                                                                                                                                                                                |
|-------------------------------|------------------------------------------------------------------------------------------------------------------------------------------------------------------------------------------------------------------------------------------------------------------------------------------------------------------------------------------------------------------------------------------------------------------------------------------------------------------------------------------------------------------------------------------------------------------------------------------------------------------------------------------------------------------------------------------------------------------------------------------------------------------------------------------------------------------------------------------------------------------------------------------------------------------------------------------------------------------------------------------------------------------------------------------------------------------------------------------------------------------------------------------------------------------------------------------------------------------------------------------------------------------------------------------------------------------------------------------------------------------------------------------------------------------------------------------------------------------------------------------------------------------------------------------------------------------------------------------------------------------------------------------------------------------------------------------------------------------------------------------------------------------------------------------------------------------------------------------------------------------------------------------------------------------------------------------------------------------------------------------------------------------------------------------------------------------------------------------------------------------------------------------------------------------------------------------------------------------------------------------------------------------------------------------------------------------------------------------------------------------------------------------------------------------------------------------------------------------------------------------------|
| Journal:                      | <i>BMJ Open</i>                                                                                                                                                                                                                                                                                                                                                                                                                                                                                                                                                                                                                                                                                                                                                                                                                                                                                                                                                                                                                                                                                                                                                                                                                                                                                                                                                                                                                                                                                                                                                                                                                                                                                                                                                                                                                                                                                                                                                                                                                                                                                                                                                                                                                                                                                                                                                                                                                                                                                |
| Manuscript ID                 | bmjopen-2020-048209                                                                                                                                                                                                                                                                                                                                                                                                                                                                                                                                                                                                                                                                                                                                                                                                                                                                                                                                                                                                                                                                                                                                                                                                                                                                                                                                                                                                                                                                                                                                                                                                                                                                                                                                                                                                                                                                                                                                                                                                                                                                                                                                                                                                                                                                                                                                                                                                                                                                            |
| Article Type:                 | Protocol                                                                                                                                                                                                                                                                                                                                                                                                                                                                                                                                                                                                                                                                                                                                                                                                                                                                                                                                                                                                                                                                                                                                                                                                                                                                                                                                                                                                                                                                                                                                                                                                                                                                                                                                                                                                                                                                                                                                                                                                                                                                                                                                                                                                                                                                                                                                                                                                                                                                                       |
| Date Submitted by the Author: | 18-Dec-2020                                                                                                                                                                                                                                                                                                                                                                                                                                                                                                                                                                                                                                                                                                                                                                                                                                                                                                                                                                                                                                                                                                                                                                                                                                                                                                                                                                                                                                                                                                                                                                                                                                                                                                                                                                                                                                                                                                                                                                                                                                                                                                                                                                                                                                                                                                                                                                                                                                                                                    |
| Complete List of Authors:     | <p>Mathews, Maria; Schulich School of Medicine and Dentistry Department of Family Medicine, Centre for Studies in Family Medicine<br/>         Spencer, Sarah; Simon Fraser University, Faculty of Health Sciences<br/>         Hedden, Lindsay ; Simon Fraser University, Faculty of Health Sciences; British Columbia Academic Health Science Network<br/>         Marshall, Emily; Dalhousie University, Department of Family Medicine<br/>         Lukewich, Julia; Memorial University of Newfoundland, Faculty of Nursing<br/>         Meredith, Leslie; Schulich School of Medicine and Dentistry Department of Family Medicine, Centre for Studies in Family Medicine<br/>         Ryan, Dana; Memorial University of Newfoundland, Faculty of Nursing<br/>         Buote, Richard; Memorial University of Newfoundland, Faculty of Medicine<br/>         Liu, Tiffany; Schulich School of Medicine and Dentistry Department of Epidemiology and Biostatistics<br/>         Volpe, Emily; Schulich School of Medicine and Dentistry Department of Epidemiology and Biostatistics<br/>         Gill, Paul; University of Toronto; Gateway Rural Health Institute<br/>         Ryan, BL; Schulich School of Medicine and Dentistry Department of Family Medicine, Centre for Studies in Family Medicine; Schulich School of Medicine and Dentistry Department of Epidemiology and Biostatistics<br/>         Schacter, Gordon; Schulich School of Medicine and Dentistry Department of Family Medicine<br/>         Wickett, Jamie ; Schulich School of Medicine and Dentistry Department of Family Medicine<br/>         Freeman, Thomas; Schulich School of Medicine and Dentistry Department of Family Medicine, Centre for Studies in Family Medicine<br/>         Sibbald, Shannon; Western University Faculty of Health Sciences, School of Health Studies; Schulich School of Medicine and Dentistry Department of Family Medicine<br/>         Wong, Eric; Schulich School of Medicine and Dentistry Department of Family Medicine; Thames Valley Family Health Team<br/>         McKay, Maddi; Doctors Nova Scotia; Dalhousie University, Department of Family Medicine<br/>         McCracken, Rita; Providence Health Care, Department of Family Medicine; University of British Columbia Faculty of Medicine, Family Practice<br/>         Brown, Judith; Schulich School of Medicine and Dentistry Department of Family Medicine, Centre for Studies in Family Medicine</p> |

1  
2  
3  
4  
5  
6  
7  
8  
9  
10  
11  
12  
13  
14  
15  
16  
17  
18  
19  
20  
21  
22  
23  
24  
25  
26  
27  
28  
29  
30  
31  
32  
33  
34  
35  
36  
37  
38  
39  
40  
41  
42  
43  
44  
45  
46  
47  
48  
49  
50  
51  
52  
53  
54  
55  
56  
57  
58  
59  
60

|           |                                              |
|-----------|----------------------------------------------|
| Keywords: | PRIMARY CARE, COVID-19, QUALITATIVE RESEARCH |
|           |                                              |

SCHOLARONE™  
Manuscripts

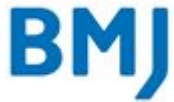

I, the Submitting Author has the right to grant and does grant on behalf of all authors of the Work (as defined in the below author licence), an exclusive licence and/or a non-exclusive licence for contributions from authors who are: i) UK Crown employees; ii) where BMJ has agreed a CC-BY licence shall apply, and/or iii) in accordance with the terms applicable for US Federal Government officers or employees acting as part of their official duties; on a worldwide, perpetual, irrevocable, royalty-free basis to BMJ Publishing Group Ltd ("BMJ") its licensees and where the relevant Journal is co-owned by BMJ to the co-owners of the Journal, to publish the Work in this journal and any other BMJ products and to exploit all rights, as set out in our [licence](#).

The Submitting Author accepts and understands that any supply made under these terms is made by BMJ to the Submitting Author unless you are acting as an employee on behalf of your employer or a postgraduate student of an affiliated institution which is paying any applicable article publishing charge ("APC") for Open Access articles. Where the Submitting Author wishes to make the Work available on an Open Access basis (and intends to pay the relevant APC), the terms of reuse of such Open Access shall be governed by a Creative Commons licence – details of these licences and which [Creative Commons](#) licence will apply to this Work are set out in our licence referred to above.

Other than as permitted in any relevant BMJ Author's Self Archiving Policies, I confirm this Work has not been accepted for publication elsewhere, is not being considered for publication elsewhere and does not duplicate material already published. I confirm all authors consent to publication of this Work and authorise the granting of this licence.

**TITLE PAGE**

**Title** Protocol for the Development of a Primary Care Pandemic Plan Informed by In-depth Policy Analysis and Qualitative Case Studies with Family Physicians across Canada During COVID-19

**Authors**

Maria Mathews<sup>1</sup>, Sarah Spencer<sup>2</sup>, Lindsay Hedden<sup>2,3</sup>, Emily Gard Marshall<sup>4</sup>, Julia Lukewich<sup>5</sup>, Leslie Meredith<sup>1</sup>, Dana Ryan<sup>5</sup>, Richard Buote<sup>6</sup>, Tiffany Liu<sup>7</sup>, Emily Volpe<sup>7</sup>, Paul S Gill<sup>8,9</sup>, Bridget Ryan<sup>1,7</sup>, Gordon Schacter<sup>1</sup>, Jamie Wickett<sup>1</sup>, Thomas R Freeman<sup>1</sup>, Shannon L Sibbald<sup>1,10</sup>, Eric Wong<sup>1,11</sup>, Maddi McKay<sup>4,12</sup>, Rita McCracken<sup>13,14</sup>, Judith Belle Brown<sup>1</sup>

**Institutional affiliations**

1. Schulich School of Medicine and Dentistry Department of Family Medicine | London, Canada
2. Simon Fraser University Faculty of Health Sciences | Burnaby, Canada
3. British Columbia Academic Health Science Network | Vancouver, Canada
4. Dalhousie University Department of Family Medicine | Halifax, Canada
5. Memorial University Faculty of Nursing | St John's, Canada
6. Memorial University Faculty of Medicine | St John's, Canada
7. Schulich School of Medicine and Dentistry Department of Epidemiology and Biostatistics | London, Canada
8. University of Toronto | Goderich, Canada
9. Gateway Rural Health Institute | Goderich, Canada
10. Western University Faculty of Health Sciences | London, Canada
11. Thames Valley Family Health Team | London, Canada
12. Doctors Nova Scotia | Dartmouth, Canada
13. University of British Columbia Faculty of Medicine | Vancouver, Canada
14. Providence Health Care Department of Family Medicine | Vancouver, Canada

**Correspondence to** Dr Maria Mathews

Centre for Studies in Family Medicine  
The Western Centre for Public Health and Family Medicine, 2nd Floor  
London, Ontario, Canada, N6A 3K7  
maria.mathews@schulich.uwo.ca

**Word Count** 3995

## ABSTRACT

**Introduction** Given the recurrent risk of respiratory illness-based pandemics, and the important roles family physicians play during public health emergencies, the development of pandemic plans for primary care are imperative. Existing pandemic plans in Canada, however, do not adequately incorporate family physicians' roles and perspectives. This policy and planning oversight has become increasingly evident with the emergence of the novel coronavirus disease, COVID-19, pandemic. This study is designed to inform the development of pandemic plans for primary care through evidence from four provinces in Canada: British Columbia, Newfoundland and Labrador, Nova Scotia, and Ontario.

**Methods and analysis** We will employ a multiple case study of regions in four provinces. Each case consists of a mixed-methods design comprised of: (1) a chronology of family physician roles in the COVID-19 pandemic response; (2) a provincial policy analysis; and (3) qualitative interviews with family physicians. Relevant policy and guidance documents will be identified through targeted, snowball, and general search strategies. Additionally, these policy documents will be analysed to identify gaps and/or emphases in existing policies and policy responses. Interviews will explore family physicians' proposed, actual, and potential roles during the pandemic, the facilitators and barriers they have encountered throughout, and the influence of gender on their professional roles. Data will be thematically analysed using a content analysis framework, first at the regional level and then through cross-case analyses.

**Ethics and dissemination** Approval for this study has been granted by research ethics boards in each study province. Findings will be disseminated via conferences and peer-reviewed publications. Evidence and lessons learned will be used to develop tools for government ministries, public health units, and family physicians for improved pandemic response plans for primary care.

**Keywords** Qualitative Research; Research Design; Physicians, Primary Care; Physicians, Family; Pandemics; COVID-19

### Strengths and Limitations

- Our interdisciplinary research team includes experienced primary care researchers, family physicians and public health experts, allowing us to draw upon their expert knowledge in the development of study tools and the interpretation and dissemination of findings.
- The use of a multiple-case study approach will aid in making distinctions between localised issues specific to a single case and cross-cutting themes present across health regions.
- While maximum variation sampling will facilitate the recruitment of participants along a wide variety of characteristics in the selected regions and provinces, the transferability of findings may be limited by provincial variation in primary care and health policy in Canada.
- We anticipate this study will highlight gaps in current pandemic response plans and identify promising practices and key facilitators to incorporate in future pandemic response plans for family physicians.

## INTRODUCTION

Family physicians have an important role to play during a pandemic, with responsibilities including sentinel surveillance, screening, testing, health education, monitoring individuals and providing follow-up care, contributing to hospital and emergency room surge capacity, and providing vaccinations.[1–5] In addition, family physicians are expected to continue providing routine primary care to individuals through their community-based practices.[4–6] Community members who are particularly reliant on primary care to maintain their health under normal circumstances may have increased care needs during and following a pandemic.[7]

There are attributes of family practice that call for clear, well-considered pandemic preparedness plans specific to primary care. Family physicians may be the first point of contact in a community-based outbreak. This requires that family physicians deal with new diseases when there is limited information about those diseases, such as their means of transmission, effective prevention practices, and therapeutic options.[8] Family physicians must also minimise the potential risk of transmission to other community members, staff, and trainees in their clinics, as well as themselves and their families.[9]

In December 2019, the severe acute respiratory syndrome coronavirus 2 (SARS-CoV-2) which causes COVID-19 appeared in China. On 30 January 2020, the World Health Organisation determined COVID-19 to be a public health emergency of international concern, and on 11 March 2020 they declared a pandemic.[10]

Canada confirmed its first presumptive case of COVID-19 on 25 January 2020.[11] Since then, the pandemic has been experienced differently across and within provinces. Nationally, there have been two distinct ‘waves’ of COVID-19 cases to date. The first ‘wave’, from April to June, peaked in May at nearly 70 new daily cases per million people; the second ‘wave’, which started in September 2020, has seen cases increase nationally to nearly 120 new daily cases per million people in November.[12] While some provinces have, to varying degrees, followed the national trend (e.g., British Columbia, Ontario, Quebec), others have avoided large first (e.g., Manitoba, Saskatchewan) or second (e.g., Newfoundland and Labrador, Nova Scotia) waves.[12]

Healthcare delivery in Canada is within the jurisdiction of individual provinces, while the federal government has responsibilities for general public health guidance. Much of primary care across Canada is publicly funded through provincial health insurance while care is delivered through family physicians operating as private businesses.[13] Such provincial control facilitates contextualised responses while reinforcing provincially-varied experiences of a pandemic. This primary care model makes communication and coordination with practices challenging – particularly where physicians are not formally linked with regional or institutional networks.

In the early months of the COVID-19 pandemic in Canada, some family physicians were hesitant to screen community members in their clinics due to inadequate supplies of the appropriate personal protective equipment (PPE), improperly equipped examination rooms, and concerns regarding proper cleaning during clinic hours.[15] Eventually, designated COVID-19 assessment centres [16,17] and community-based PPE distribution [14] and government control of supply chains [18] were implemented to address some of these concerns.

The prolonged nature of physical distancing and ‘stay-at-home’ orders have disrupted community primary care visits. Fewer community members sought primary care – either delaying or forgoing routine visits – and few individuals were willing to have an in-person visit.[19] For fee-for-service practices, the decrease in service volumes reduced revenues, leaving some practices struggling to pay fixed overhead costs.[15,20–22]

1  
2  
3  
4 Prior to the pandemic, virtual and telehealth services were only minimally offered by  
5 family physicians in Canada.[23] In response to the pandemic, synchronous virtual care has been  
6 adopted widely, facilitated by the introduction or modification of billing codes.[24] Because the  
7 need for virtual visits emerged so quickly, some physicians and community members have  
8 encountered barriers to adapting to this change due to a variety of factors such as technology and  
9 platform concerns, a lack of prior training in virtual clinical assessments and care, access to  
10 internet and private spaces, and the health literacy of individuals seeking care.[25]

11 Many family physicians also work in a variety of other healthcare settings that are  
12 directly affected by or involved in the pandemic response (e.g., hospitals, long-term care homes,  
13 non-profit community services).[15] Family physicians with institutional affiliations (e.g.,  
14 hospital privileges) may be expected to add to surge capacity in these institutions, while other  
15 physicians may be redeployed to assessment and testing centres or to provide care beyond their  
16 traditional scope of practice.[26]

17  
18 Outbreaks of COVID-19 in long-term care facilities prompted orders for residential  
19 caregivers to work in a single setting in some provinces,[27–29] though it is unclear how these  
20 orders will affect the roles of physicians as the pandemic proceeds. Family physicians, in  
21 particular those working in rural communities who provided care to multiple settings prior to the  
22 pandemic, may be particularly hard-pressed to operate community-based practices while meeting  
23 their obligations to hospitals and long-term care homes if they are limited to a single setting.

24 Finally, given that women make up a growing proportion of the family physician  
25 workforce,[30] and as caregiving roles evolve, pandemic plans struggled to incorporate gender  
26 considerations. Family physicians may care for children or older relatives and may therefore be  
27 unable or unwilling to participate in some or all pandemic roles due to a lack of care support,  
28 isolation protocols following exposure, and their desire to minimise exposure risk to their loved  
29 ones.  
30  
31

32 In the absence of clearly defined pandemic plans for primary care, it is uncertain how  
33 family physicians have informed their care provision and role fulfilment during the current  
34 pandemic. With multiple sources of information providing updates and guidance as the pandemic  
35 unfolds, it is possible that family physicians may hold varied and potentially competing views on  
36 their responsibilities. Further, with minimal recent experience with primary care provision during  
37 a pandemic, policymakers have limited evidence of family physicians' professional and personal  
38 experiences with implementing the policies envisioned for them and their communities of care.  
39 As deployment of primary care and COVID-19 are provincial responsibilities, Canada offers a  
40 strong opportunity to conduct case studies comparing approaches and outcomes to inform future  
41 pandemic planning in primary care.  
42  
43

44 In this study, we will draw upon the experiences of family physicians throughout the  
45 COVID-19 pandemic to guide the ongoing response to COVID-19 and develop primary care  
46 response plans for future pandemics. We anticipate this study will highlight gaps in current  
47 pandemic response plans; identify variation along traits such as urban/rural location, affiliation  
48 with regional organisational structures, funding models, and gender; and illustrate promising  
49 practices and key facilitators. The findings will help ensure physicians are supported to fulfil  
50 their roles during a pandemic and that community members' access to primary care is minimally  
51 disrupted throughout all stages of a pandemic.  
52

## 53 Objectives

54  
55  
56  
57



1  
2  
3 This research seeks to understand the formal and informal roles of family physicians during a  
4 pandemic, and the facilitators and barriers family physicians encounter in fulfilling those roles.  
5 Specifically, our objectives are:

- 6 1. to describe the proposed, actual, and potential roles of family physicians during different  
7 stages of the COVID-19 pandemic;
- 8 2. to describe the facilitators and barriers to the proposed, actual, and potential family  
9 physician roles during different stages of the COVID-19 pandemic;
- 10 3. to describe gender differences in the roles, facilitators, and barriers of family physicians  
11 during different stages of the COVID-19 pandemic; and
- 12 4. to compare and contrast the proposed, actual, and potential roles of family physicians and  
13 the facilitators and barriers to these family physician roles across four Canadian  
14 provinces.  
15

16  
17 “Roles” in this context refers to specific tasks and/or responsibilities that family physicians are  
18 asked or required to perform during the stages of the pandemic. These roles are expected to cease  
19 once the pandemic is over and 'normal' operations resume.  
20

## 21 **METHODS**

### 22 **Overall Study design**

23  
24 This study is comprised of multiple mixed methods case studies,[31] with each case examining  
25 the pandemic response of family physicians in one of four regions of Canada: the Vancouver  
26 Coastal Health region in British Columbia, the Eastern Health Region of Newfoundland and  
27 Labrador, the province of Nova Scotia, and Ontario Health West Region.  
28

29 Vancouver Coastal Health is one of five regional health authorities in British Columbia,  
30 providing care to a quarter of the provincial populace (1.25 million individuals) through primary,  
31 residential, and acute care, public health, mental health, and substance use programmes.[32] The  
32 Eastern Health Region is the largest of four regional health authorities in Newfoundland and  
33 Labrador, providing a full spectrum of health services to over half of the province’s residents  
34 (more than 300,000 community members).[33] Nova Scotia Health provides a range of  
35 healthcare through hospitals, health centres, and community-based programmes to all (nearly one  
36 million) residents of the province of Nova Scotia, as well as some specialised services for  
37 Atlantic Canadians.[34] The Ontario Health West region includes the areas served by the four  
38 westernmost Local Health Integration Networks, which are responsible for coordination of  
39 primary, home, and community care, community health centres, hospitals, long-term care, and  
40 mental health and addictions support for roughly 2.6 million residents.[35] The newly formed  
41 Ontario Health West agency is coordinating the COVID-19 response in the region.[36] These  
42 regions, while pragmatically representing the locations of our pre-existing research team, have  
43 variation in their numbers of COVID-19 cases and deaths, include urban and rural communities,  
44 links to acute care, and represent varied regional structures and primary care funding and  
45 practice models.  
46  
47  
48

49 Each case study will consist of a mixed-methods design, including: (1) a chronology of  
50 family physician roles in the COVID-19 pandemic response; (2) a provincial policy analysis; and  
51 (3) qualitative interviews with family physicians. We will compare and contrast findings across  
52 cases in order to identify comprehensive themes, shared lessons learned, and promising  
53 practices.  
54

### 55 **Chronology**

## Approach

Each provincial team will compile a chronology to describe key milestones in the COVID-19 pandemic and family physicians' roles and responsibilities in each pandemic stage. We will also identify policies that influenced how family physicians performed pandemic-related roles. A comprehensive document review of grey literature including federal, provincial, and regional health policy documents, government briefings and news reports, and policies and communications from health professional organisations (e.g., provincial colleges of physicians and surgeons and colleges of family medicine, Canadian Medical Association, College of Family Physicians of Canada), will be used to inform the chronology and a policy analysis.

Relevant documents will be identified using a combination of targeted and general search strategies. Through our targeted search, we will review government, public health and health professional organisation, health institution, and medical school websites throughout all four regions. These targeted websites will facilitate snowball searches of linked and/or referenced websites, documents, and resources. As part of a general search, we will conduct ongoing online searches using the following terms and logic: province or region name or abbreviation (e.g., "BC" or "British Columbia" or "VCH" or "Vancouver Coastal Health"); and "covid" or "COVID-19" or "coronavirus"; and "primary care" or "family physician" or "family doctor" or "general practitioner".

In the chronology, we will note the progression of the pandemic (e.g., number of cases, number of deaths); declarations, actions, and ministerial orders (e.g., declarations of a pandemic and/or public health emergency, closures, stay-at-home orders, essential work definitions, re-openings); and directives, supports, programmes, and guidance for community members, institutions, and healthcare workers. While the primary focus for each provincial study team will be their selected health region, we will also document pivotal milestones and policies at the provincial, national, and international levels to provide the appropriate context for the chronologies.

Chronologies will be verified by public health, family physicians, and primary care professionals in each region to ensure completeness, establish face validity, and identify missing events or data sources. Provided that the project will take place throughout the current COVID-19 pandemic, the document review will be ongoing and verification will occur at multiple points in the study.

We will use the chronologies to identify the distinct stages in the pandemic response in each region and the proposed roles of family physicians outlined in pandemic plans and guiding documents. The chronology will be used as a common frame of reference in the qualitative interviews, helping to create an initial portrait of the actual role and reveal facilitators and barriers encountered by family physicians.

## Policy analysis

The document search, criteria, and review used to develop the regional chronologies will also form the basis for provincial policy analyses that will characterise the policies that have influenced family physicians throughout the pandemic. These analyses will identify gaps and emphases within pre-existing policies and supports and those that emerged in response to COVID-19.

To be included in the policy analysis, a policy must relate (directly or indirectly) to the roles of family physicians and/or primary care practices at any point during the COVID-19 pandemic. Policies may be pre-existing, a modification of existing policy, or new policy in

1  
2  
3 response to the COVID-19 pandemic. The policy may apply to any sites where family physicians  
4 routinely work, including office-based care, long-term care, hospitals, home, or walk-in clinics,  
5 but must pertain specifically to family physicians or their practice staff and to activities at all  
6 locations (rather than a single location).  
7

8 Each policy from the chronology document review will be assessed for inclusion and  
9 coded according to the following:

- 10 • the jurisdiction targeted by the policy (e.g., region, province, national, international, or  
11 other);
- 12 • the reported start and end date (where applicable) of the policy;
- 13 • the pandemic stage when the policy was issued;
- 14 • a summary of the policy, including a description of the corresponding family physician  
15 role to which the policy relates;
- 16 • the type of organisation issuing the policy (e.g., government, public health agency,  
17 medical professional association, health region/institution) and the level at which the  
18 organisation operates (e.g., international, national, provincial, regional);
- 19 • the level of the policy's application (e.g., international, national (i.e., to all Canadian  
20 residents), provincial (i.e., to all resident of a province) etc.); and
- 21 • the type of policy instrument: 'do nothing', 'exhortation', 'expenditure', 'regulation', and  
22 'public ownership'.<sup>[37]</sup>

23  
24  
25 Each policy will be coded using a Qualtrics (SAP Software Solutions) survey. An initial set of  
26 twenty policies (five from each case) will be selected randomly and completed by all coders to  
27 identify additional codes, coding categories, to clarify instructions, ensure consistent application  
28 of procedures, and resolve any coding disputes. Frequencies and cross-tabulations will be  
29 derived to describe the types of policy instruments issued in each jurisdiction, by different  
30 organisations, and to support the different roles of family physicians.  
31

### 32 **Qualitative interviews**

33  
34 Following the development and verification of initial provincial chronologies and in parallel with  
35 the policy analysis, we will conduct semi-structured qualitative interviews with family  
36 physicians working in each study region. Interviews will be 45 to 60 minutes in length and, due  
37 to the ongoing COVID-19 pandemic, will be conducted by Zoom (Zoom Video Communications  
38 Inc.) or telephone, depending on participant preference. With the permission of participants,  
39 interviews will be audio-recorded and transcribed verbatim and notes will be taken for analysis.  
40

41 For each interview, participants will be provided a copy of the region-specific chronology  
42 and we will ask that they describe for each pandemic stage: the facilitators and barriers they  
43 experienced in performing the proposed roles outlined in the chronology; their actual role and the  
44 facilitators and barriers they encountered in its fulfilment; the potential roles that family  
45 physicians could have filled at each stage of the pandemic, as well as the facilitators and barriers  
46 to fulfilment; and how their gender influences their proposed, actual, and potential roles as  
47 family physicians during the pandemic. Interviews will involve background questions on  
48 participants' gender, years of practice, work settings, clinic roles, and the demographics of their  
49 practice populations.  
50

51 Given the dynamic nature of the pandemic and the evolving roles of family physicians,  
52 and that data collection will be ongoing as the pandemic persists, each participant will be asked  
53 if we may contact them for a potential second interview of a similar format.  
54

55 Study sample and recruitment  
56  
57

1  
2  
3 Consistent with maximum variation sampling,[38] we will recruit family physicians along a wide  
4 range of characteristics, such as family physicians with and without an academic appointment, of  
5 different genders, from different primary care funding and practice models, with and without  
6 team/regional health authority affiliations, and with varied community demographics. We  
7 anticipate recruiting approximately 24 to 30 physicians in each region (around 120 overall);  
8 however, we will continue recruiting until we have sufficient data to allow for rigorous analysis  
9 and to accurately represent the experiences of family physicians with shared characteristics as  
10 noted above (i.e., saturation).  
11

12 To be included in the study, family physicians must have been licensed to practice in  
13 2020 and be either clinically active or eligible to be clinically active in the applicable region of  
14 the study province during the pandemic. Eligibility to be clinically active is intended to include  
15 participants who may have changed their work plans in response to the pandemic (e.g., return  
16 from parental, medical, or other types of leave or travel). We will include family physicians who  
17 work solely in institutional settings, including long-term care facilities and hospitals.  
18

19 We will exclude post-graduate medical residents, as well as international medical  
20 graduates permitted to practice solely during the pandemic since the latter's roles may be  
21 influenced by educational or licensing policies. Physicians in solely academic, research, or  
22 administrative roles will also be excluded.  
23

24 To recruit family physicians, a research assistant will email or fax a study invitation to  
25 prospective participants providing information about the study and requesting their participation  
26 in an interview. Family physicians will be identified through faculty lists, lists of teams and  
27 practices (e.g., family health teams, community health centres), privileging lists, and provincial  
28 College of Physicians and Surgeons' physician search portals. Due to provincial variance in  
29 access to lists of family physicians, we will also advertise through professional organisations'  
30 newsletters, social media posts, and employ third-party recruitment (i.e., snowballing). In the  
31 case of snowballing, we will encourage participants to share our study and contact information  
32 with their professional networks, allowing interested physicians to initiate contact with the study  
33 team to obtain further details, confirm eligibility, and schedule an interview.  
34  
35

## 36 Analysis

37 The interview recordings will be transcribed verbatim, proofread, and validated for accuracy  
38 with the participants as necessary. Field notes will also be taken during interviews by the  
39 researchers. All data will be thematically analysed for themes related to the research objectives  
40 using a content analysis framework. Employing a comparative analysis approach, at least two  
41 members of the research team will independently read each transcript and the interviewer's  
42 corresponding notes to identify key themes and develop a robust coding framework around  
43 which further analysis will be structured.[39,40] A codebook will be developed to list and define  
44 all codes, to aid in the consistency of their application.  
45  
46

47 Through subsequent iterations of the coding process, we will move from more descriptive  
48 to more analytic codes, developing broader conceptual themes from the interview data. The  
49 researchers will determine codes for all data and harmonise the key themes. Analysis of  
50 transcripts will then be conducted using NVivo 12 (QSR International) software for qualitative  
51 data analysis.[39,40] Descriptive statistics will be extracted from the demographic data and used  
52 to summarise the characteristics of the study participants.  
53

## 54 Cross-case analysis

55  
56  
57

1  
2  
3 As results from each regional case – including chronology, policy analysis and interviews –  
4 emerge, we will compare and contrast findings across cases to identify comprehensive themes,  
5 shared lessons learned, and promising practices. The use of a multiple-case study approach  
6 facilitates the distinction between localised issues specific to a single case and cross-cutting  
7 themes present across multiple health regions.[31] Given the differences in primary healthcare  
8 systems across Canadian provinces, cross-case analyses will also allow us to examine plausible  
9 or rival explanations by contrasting responses and exploring varying contextual conditions in the  
10 four cases.  
11

### 12 **Study rigour**

14 To enhance the rigour of this multiple-case study, we will draw upon evidence gathered in the  
15 chronology, policy analysis, and qualitative interviews which will be conducted using consistent  
16 methods across all four cases.[31,41] We will prepare interview guides and pre-test questions,  
17 document our interviewing and transcription protocols, use experienced interviewers, and  
18 member-check with the participants during interviews. Further, our interdisciplinary team  
19 includes family physicians and public health experts, allowing us to draw on prior expert  
20 knowledge in the development of our research tools and the interpretation of our results.[31]  
21

22 The research will also be conducted and presented in accordance with the consolidated  
23 criteria for reporting qualitative research (COREQ).[42] We will keep detailed records of the  
24 interviews (i.e., audio recordings, transcripts), field notes, drafts of the coding template, and  
25 document coding disagreements and their resolutions. We will look for negative cases and  
26 encourage and document self-reflection among all members of the research team. In our  
27 dissemination of findings, we will provide thick descriptions[43] and use illustrative quotes.  
28

### 29 **Patient or public involvement**

30 Neither patients nor the public have been involved in the development of this research.  
31

## 32 **ETHICS AND DISSEMINATION**

### 33 **Ethics approval**

34 We have obtained approval from the research ethics boards at Simon Fraser University and the  
35 University of British Columbia (through harmonised Research Ethics of British Columbia), the  
36 Health Research Ethics Board of Newfoundland and Labrador, Nova Scotia Health, and the  
37 University of Western Ontario.  
38

### 39 **Informed consent**

40 The research coordinator will contact interested participants by email or fax, provide them with  
41 study information and the study consent form, and ask them to complete and return the form. The  
42 research coordinator and principal investigator in each region are available to answer any  
43 questions and will only proceed with an interview once written consent has been received.  
44 Individuals may refuse to participate, refuse to answer any questions, or withdraw from the study  
45 at any point up until their data have been combined with other participants' for analysis.  
46 Participants do not waive any legal rights by signing the consent form.  
47

### 48 **Confidentiality**

49 All measures will be taken to reduce the risk of a privacy breach and maintain participant  
50 confidentiality. Audio recordings will be kept on secure storage provided by the affiliated  
51

1  
2  
3 academic institutions until they have been transcribed and the transcripts verified by the  
4 interviewer and/or participant.

5 Participants' full name and contact information will be used to schedule their interview  
6 and additional demographic information, such as gender and type of practice will be used to  
7 ensure variation in interview participants, however this information will be kept separate from  
8 audio files and transcribed interviews by using unique participant codes. The master list of  
9 participants' names and their unique codes will be kept separate from study data and will not be  
10 shared with other regional study teams. All other identifying information that may be mentioned  
11 will be obscured during the transcription process. Participants' names will not be used in any  
12 published findings.  
13  
14

### 15 **Knowledge translation**

16  
17 In alignment with an integrated knowledge translation model,[44] this project was motivated by  
18 conversations with physicians and health system administrators during the early stages of the  
19 pandemic. Family physicians voiced questions and concerns about implementing guidelines from  
20 local public health organisations and emphasised the necessity of a coordinated pandemic  
21 response plan for primary care. To maintain this integration of knowledge users throughout the  
22 study, and to ensure that our data collection, analysis, and dissemination is reflective of family  
23 physicians' perspectives and information needs, our team includes community-based family  
24 physicians as co-investigators and collaborators within each region.  
25

26 We will disseminate our findings throughout the twelve-month project. Emergent  
27 findings will be shared through the communication channels (e.g., websites, newsletters) of the  
28 four principal investigators and through our study team's knowledge user and collaborator  
29 partners. Results will provide government ministries, public health units, other health  
30 organisations, and family physicians with evidence and tools to better inform their ongoing and  
31 future pandemic responses. We will prepare articles for publication in peer-reviewed open-access  
32 journals, write op-eds, conduct media interviews, participate in online discussions (e.g.  
33 healthydebate.ca), and employ social media. We will also share findings through regional,  
34 national, and international conferences both virtually and in-person, once current pandemic-  
35 related travel restrictions are lifted.  
36  
37

38 Although, there are many other healthcare providers in primary healthcare, this study  
39 focuses on family physicians because physician-led practices remain the most prevalent form of  
40 primary healthcare organisation in Canada. Similarly, we recognise that our project is a single,  
41 albeit important, step in the creation of primary care pandemic preparedness plans which will  
42 ultimately require the engagement of a broader range of health professionals, and government,  
43 professional, and regional organisations.  
44

45  
46 **Acknowledgments** Many thanks to our study participants for sharing their time and experiences  
47 with us while continuing to provide care to their communities throughout the ongoing COVID-  
48 19 pandemic. Thanks, as well, to Shabnam Asghari, Kris Aubrey-Bassler, Caitlyn Ayn, Erin  
49 Christian, Catherine Faulds, Le Gao, Rick Gibson, George Kim, Aimee Letto, Lauren Mauritz,  
50 Steve Slade, Nardia Strydom, Alex Summers, Amanda Terry, Amardeep Thind, Robert  
51 Thompson, Steve Wetmore, and Jennifer Young for their expertise and insights in the  
52 development of this study protocol and their ongoing support of the Pandemic Planning for  
53 Primary Care study.  
54  
55  
56  
57

1  
2  
3 **Author contributions** The first author named is lead and corresponding author. Contributions  
4 to the paper are described using the CRediT taxonomy (*Brand et al. (2015), Learned Publishing*  
5 *28(2)*). Writing – Original Draft: MM, SS; Writing – Review and Editing: SS, LH, MM, JL,  
6 EGM, LM, DR, RB, TL, EV, SLS, RM, MM, TRF, EW, JBB, PSG, BR, GS, JW;  
7 Conceptualisation: MM, LH, EGM, JL; Methodology: MM, LH, EGM, JL, LM, SS, RB, DR,  
8 TL, EV, SLS, RM, MM, TRF, EW, JBB, PSG, BR, GS, JW; Supervision: MM, LH, EGM, JL;  
9 Project Administration: MM, LM, LH, SS, EGM, JL, RB, DR; Funding Acquisition: MM, LH,  
10 EGM, JL. All authors have read and approved the final manuscript.  
11  
12

13 **Funding** This study is funded by a grant from the Canadian Institutes for Health Research  
14 (VR41 72756).  
15  
16

17 **Competing interests** None declared.  
18

19 **Ethics approval** This study has been approved by the Western University Research Ethics  
20 Board (Project ID 116315), Nova Scotia Health Authority Research Ethics Board (File No.  
21 1026085), Research Ethics British Columbia (No. H20-02998), and Health Research Ethics  
22 Board of Newfoundland and Labrador (No. 2020.251).  
23  
24

25 **Patient consent for publication** Not required.  
26

27 **Provenance and peer review** Not commissioned; externally peer reviewed.  
28

29 **Data availability** Datasets have not yet been generated or analysed for this study and are  
30 therefore not available.  
31  
32  
33  
34  
35  
36  
37  
38  
39  
40  
41  
42  
43  
44  
45  
46  
47  
48  
49  
50  
51  
52  
53  
54  
55  
56  
57  
58  
59  
60

**REFERENCES**

1. Mazowita G. Role for primary care in epidemic surge capacity. *Can Fam Physician*. 2006;52:951.
2. Vancouver Coastal Health. The Regional Pandemic Outbreak Response Plan. Vancouver: Vancouver Coastal Health; 2018 Sep. Available from: <https://sneezesdiseases.com/assets/uploads/1578342909B2QYPNFREK5cN5EDsglaGYPKRX9A.pdf>
3. Public Health Agency of Canada. COVID-19 pandemic guidance for the health care sector. 2020 [cited 2020 Nov 6]. Available from: <https://www.canada.ca/en/public-health/services/diseases/2019-novel-coronavirus-infection/health-professionals/covid-19-pandemic-guidance-health-care-sector.html#a322>
4. Ministry of Health. Planning Guide for Respiratory Pathogen Season. Toronto: Government of Ontario; 2019 Oct. Available from: [http://www.health.gov.on.ca/en/pro/programs/publichealth/flu/docs/planning\\_guide\\_rps.pdf](http://www.health.gov.on.ca/en/pro/programs/publichealth/flu/docs/planning_guide_rps.pdf)
5. Public Health Agency of Canada. Canadian pandemic influenza preparedness: planning guidance for the health sector. 2018. Available from: [http://epe.lac-bac.gc.ca/100/201/301/weekly\\_acquisitions\\_list-ef/2019/19-06/publications.gc.ca/collections/collection\\_2019/aspc-phac/HP40-144-2018-eng.pdf](http://epe.lac-bac.gc.ca/100/201/301/weekly_acquisitions_list-ef/2019/19-06/publications.gc.ca/collections/collection_2019/aspc-phac/HP40-144-2018-eng.pdf)
6. Harvey BJ. The issue of public health. *Can Fam Physician*. 2009;55:1057.
7. Runkle JD, Brock-Martin A, Karmaus W, Svendsen ER. Secondary Surge Capacity: A Framework for Understanding Long-Term Access to Primary Care for Medically Vulnerable Populations in Disaster Recovery. *Am J Public Health*. 2012;102:e24–32.
8. Hogg W, Huston P, Martin C, Saginur R, Newbury A, Vilis E, et al. Promoting best practices for control of respiratory infections. *Can Fam Physician*. 2006;52:1110–6.
9. Provincial Infection Control Network of British Columbia. Infection Prevention and Control Guidelines for Providing Healthcare to Clients Living in the Community. Vancouver: Provincial Health Services Authority; 2014 Jun. Available from: [https://www.picnet.ca/wp-content/uploads/PICNet\\_Home\\_and\\_Community\\_Care\\_Guidelines\\_2014\\_.pdf](https://www.picnet.ca/wp-content/uploads/PICNet_Home_and_Community_Care_Guidelines_2014_.pdf)
10. World Health Organisation. Timeline of WHO’s response to COVID-19. World Health Organ. 2020 [cited 2020 Nov 10]. Available from: <https://www.who.int/news/item/29-06-2020-covidtimeline>
11. Nasser S, Blum B. Canada’s 1st ‘presumptive’ case of coronavirus found in Toronto. *CBC News*. 2020 Jan 25 [cited 2020 Nov 10]; Available from: <https://www.cbc.ca/news/canada/toronto/canada-1st-case-coronavirus-toronto-1.5440760>



12. Provincial Health Service Authority. BCCDC COVID-19 Canadian and Global Epidemiology. 2020 [cited 2020 Nov 17]. Available from: [https://bccdc.shinyapps.io/covid19\\_global\\_epi\\_app/](https://bccdc.shinyapps.io/covid19_global_epi_app/)
13. Hutchison B, Levesque J-F, Strumpf E, Coyle N. Primary Health Care in Canada: Systems in Motion. *Milbank Q*. 2011;89:256–88.
14. Shah M, Ho J, Zhong A, Fung M, Elia M, Dang J, et al. In a Time of Need: A Grassroots Initiative in Response to PPE Shortage in the COVID-19 Pandemic. *Healthc Q*. 2020;23:9–15.
15. Lemire F, Slade S. Reflections on family practice and the pandemic first wave. *Can Fam Physician*. 2020;66:468.
16. Butler C. Here’s what it’s like inside London’s first COVID-19 assessment centre. *CBC News*. 2020 Mar 17 [cited 2020 Nov 3]; Available from: <https://www.cbc.ca/news/canada/london/london-ontario-covid-19-assessment-1.5500499>
17. Daflos P. Metro Vancouver cities identifying facilities for makeshift hospitals and COVID-19 testing sites. *CTV News*. 2020 Mar 26; Available from: <https://bc.ctvnews.ca/metro-vancouver-cities-identifying-facilities-for-makeshift-hospitals-and-covid-19-testing-sites-1.4870503>
18. Hunter J, Bailey I. B.C. assumes power to take over supply chains amid COVID-19. *Globe Mail*. Online. Victoria and Vancouver; 2020 Mar 26 [cited 2020 Oct 11]; Available from: <https://www.theglobeandmail.com/canada/british-columbia/article-bc-assumes-power-to-take-over-supply-chains-amid-covid-19/>
19. Daflos P. ‘The lights are on’: B.C. doctors encourage cautious public to seek medical care when needed. *CTV News*. 2020 Apr 7 [cited 2020 Nov 10]; Available from: <https://bc.ctvnews.ca/the-lights-are-on-b-c-doctors-encourage-cautious-public-to-see-medical-care-when-needed-1.4887569>
20. Pimlott N. Hope in a global pandemic. *Can Fam Physician*. The College of Family Physicians of Canada; 2020;66:312.
21. Farooqui S. Doctors’ association says help from government not enough to survive COVID-19. *CBC News*. 2020 Apr 19 [cited 2020 Nov 3]; Available from: <https://www.cbc.ca/news/canada/toronto/covid-ontario-doctors-1.5537919>
22. Quinn M. N.L. arranges financial relief for doctors signing up to fight COVID-19. *CBC News*. 2020 Apr 15 [cited 2020 Nov 3]; Available from: <https://www.cbc.ca/news/canada/newfoundland-labrador/covid19-newfoundland-doctors-pay-1.5531536>
23. Bhatia RS, Falk W. Modernizing Canada’s Healthcare System Through the Virtualization of Services. *CD Howe Inst E-Brief*. 2018 [cited 2020 Nov 17]; Available from: <https://www.ssrn.com/abstract=3184876>

- 1  
2  
3 24. CIHI. Physician billing codes in response to COVID-19. *Can. Inst. Health Inf.* 2020 [cited  
4 2020 Nov 17]. Available from: [https://www.cihi.ca/en/physician-billing-codes-in-response-to-](https://www.cihi.ca/en/physician-billing-codes-in-response-to-covid-19)  
5 covid-19  
6
- 7 25. Glauser W. Virtual care is here to stay, but major challenges remain. *Can Med Assoc J.*  
8 2020;192:E868-9.  
9
- 10 26. Oetter HM. COVID-19: Important update regarding scope of practice. *Coll. Physicians Surg.*  
11 Br. Columbia. 2020 [cited 2020 Oct 9]. Available from: [https://www.cpsbc.ca/files/pdf/2020-03-](https://www.cpsbc.ca/files/pdf/2020-03-30-COVID-19-Update-regarding-scope-of-practice.pdf)  
12 30-COVID-19-Update-regarding-scope-of-practice.pdf  
13  
14
- 15 27. Lysyshyn M. Recommendations to reduce the risk of COVID-19 in licensed residential care  
16 facilities (other than Long-Term Care Facilities for seniors). Vancouver Coastal Health; 2020  
17 [cited 2020 Oct 22]. Available from:  
18 [https://sneezediseases.com/assets/uploads/1587064011T3cj0AB3hl0pbFIRTSoa1MdP7RFY.pd](https://sneezediseases.com/assets/uploads/1587064011T3cj0AB3hl0pbFIRTSoa1MdP7RFY.pdf)  
19 f  
20  
21
- 22 28. Minister of Public Safety and Solicitor General. Order of the Minister of Public Safety and  
23 Solicitor General, Emergency Program Act - Ministerial Order No. M105. Government of  
24 British Columbia; 2020 [cited 2020 Oct 1]. Available from:  
25 [https://www2.gov.bc.ca/assets/gov/public-safety-and-emergency-services/emergency-](https://www2.gov.bc.ca/assets/gov/public-safety-and-emergency-services/emergency-preparedness-response-recovery/gdx/orders-april-10/ep_act_order_m105-2020_single_site.pdf)  
26 preparedness-response-recovery/gdx/orders-april-10/ep\_act\_order\_m105-2020\_single\_site.pdf  
27  
28
- 29 29. CBC News. Ontario to stop caregivers from working at multiple long-term care homes as  
30 COVID-19 spreads like 'wildfire'. *CBC News.* 2020 Apr 14 [cited 2020 Nov 3]; Available from:  
31 [https://www.cbc.ca/news/canada/toronto/ontario-to-stop-caregivers-from-working-at-multiple-](https://www.cbc.ca/news/canada/toronto/ontario-to-stop-caregivers-from-working-at-multiple-long-term-care-homes-as-covid-19-spreads-like-wildfire-1.5531920)  
32 long-term-care-homes-as-covid-19-spreads-like-wildfire-1.5531920  
33
- 34 30. Hedden L, Barer ML, Cardiff K, McGrail KM, Law MR, Bourgeault IL. The implications of  
35 the feminization of the primary care physician workforce on service supply: a systematic review.  
36 *Hum Resour Health.* 2014 [cited 2020 Nov 3];12. Available from: [https://human-resources-](https://human-resources-health.biomedcentral.com/articles/10.1186/1478-4491-12-32)  
37 health.biomedcentral.com/articles/10.1186/1478-4491-12-32  
38  
39
- 40 31. Yin RK. Case study research: design and methods. 5th ed. Los Angeles: SAGE Publications;  
41 2014.  
42
- 43 32. Vancouver Coastal Health. About us. *Vanc. Coast. Health.* 2020 [cited 2020 Nov 17].  
44 Available from: <http://www.vch.ca/about-us>  
45
- 46 33. Eastern Health. About Us. *East. Health Nfld. Labrador.* 2019 [cited 2020 Nov 17]. Available  
47 from: <http://www.easternhealth.ca/AboutEH.aspx>  
48  
49
- 50 34. Nova Scotia Health Authority. About Us. 2020 [cited 2020 Nov 24]. Available from:  
51 <http://www.nshealth.ca/about-us>  
52
- 53 35. Government of Ontario. Ontario Taking Next Steps to Integrate Health Care System. 2019  
54 [cited 2020 Dec 4]. Available from: [https://news.ontario.ca/en/release/54585/ontario-taking-](https://news.ontario.ca/en/release/54585/ontario-taking-next-steps-to-integrate-health-care-system)  
55 next-steps-to-integrate-health-care-system  
56  
57

- 1  
2  
3 36. Ontario Health. New Health System COVID-19 Response Structure. Government of Ontario;  
4 2020 [cited 2020 Dec 4]. Available from:  
5 [https://www.wrh.on.ca/uploads/Coronavirus/MEMO\\_New\\_Health\\_Response\\_Structure.pdf](https://www.wrh.on.ca/uploads/Coronavirus/MEMO_New_Health_Response_Structure.pdf)  
6  
7  
8 37. Deber RB, Mah CL. Case Studies in Canadian Health Policy and Management. 2nd ed.  
9 Toronto: University Of Toronto Press; 2014.  
10  
11 38. Creswell JW. Research design: qualitative, quantitative, and mixed methods approaches. 4th  
12 ed. Thousand Oaks: SAGE Publications; 2014.  
13  
14 39. Berg BL. Qualitative research methods for the social sciences. 2nd ed. Boston: Allyn and  
15 Bacon; 1995.  
16  
17 40. Guest G. Applied thematic analysis. Thousand Oaks: SAGE Publications; 2012.  
18  
19 41. Creswell JW. Qualitative inquiry and research design: choosing among five approaches. 3rd  
20 ed. Los Angeles: SAGE Publications; 2013.  
21  
22 42. Tong A, Sainsbury P, Craig J. Consolidated criteria for reporting qualitative research  
23 (COREQ): a 32-item checklist for interviews and focus groups. *Int J Qual Health Care.*  
24 2007;19:349–57.  
25  
26 43. Green J, Thorogood N. Qualitative Methods for Health Research. 4th ed. London: SAGE  
27 Publications; 2018.  
28  
29 44. Graham ID, Logan J, Harrison MB, Straus SE, Tetroe J, Caswell W, et al. Lost in knowledge  
30 translation: Time for a map? *J Contin Educ Health Prof.* 2006;26:13–24.  
31  
32  
33  
34  
35  
36  
37  
38  
39  
40  
41  
42  
43  
44  
45  
46  
47  
48  
49  
50  
51  
52  
53  
54  
55  
56  
57  
58  
59  
60

# BMJ Open

## Development of a Primary Care Pandemic Plan Informed by In-Depth Policy Analysis and Interviews with Family Physicians across Canada During COVID-19: A Qualitative Case Study Protocol

|                               |                                                                                                                                                                                                                                                                                                                                                                                                                                                                                                                                                                                                                                                                                                                                                                                                                                                                                                                                                                                                                                                                                                                                                                                                                                                                                                                                                                                                                                                                                                                                                                                                                                                                                                                                                                                                                                                                                                                                                                                                                                                                                                                                                                                                                                                                                                                                                                              |
|-------------------------------|------------------------------------------------------------------------------------------------------------------------------------------------------------------------------------------------------------------------------------------------------------------------------------------------------------------------------------------------------------------------------------------------------------------------------------------------------------------------------------------------------------------------------------------------------------------------------------------------------------------------------------------------------------------------------------------------------------------------------------------------------------------------------------------------------------------------------------------------------------------------------------------------------------------------------------------------------------------------------------------------------------------------------------------------------------------------------------------------------------------------------------------------------------------------------------------------------------------------------------------------------------------------------------------------------------------------------------------------------------------------------------------------------------------------------------------------------------------------------------------------------------------------------------------------------------------------------------------------------------------------------------------------------------------------------------------------------------------------------------------------------------------------------------------------------------------------------------------------------------------------------------------------------------------------------------------------------------------------------------------------------------------------------------------------------------------------------------------------------------------------------------------------------------------------------------------------------------------------------------------------------------------------------------------------------------------------------------------------------------------------------|
| Journal:                      | <i>BMJ Open</i>                                                                                                                                                                                                                                                                                                                                                                                                                                                                                                                                                                                                                                                                                                                                                                                                                                                                                                                                                                                                                                                                                                                                                                                                                                                                                                                                                                                                                                                                                                                                                                                                                                                                                                                                                                                                                                                                                                                                                                                                                                                                                                                                                                                                                                                                                                                                                              |
| Manuscript ID                 | bmjopen-2020-048209.R1                                                                                                                                                                                                                                                                                                                                                                                                                                                                                                                                                                                                                                                                                                                                                                                                                                                                                                                                                                                                                                                                                                                                                                                                                                                                                                                                                                                                                                                                                                                                                                                                                                                                                                                                                                                                                                                                                                                                                                                                                                                                                                                                                                                                                                                                                                                                                       |
| Article Type:                 | Protocol                                                                                                                                                                                                                                                                                                                                                                                                                                                                                                                                                                                                                                                                                                                                                                                                                                                                                                                                                                                                                                                                                                                                                                                                                                                                                                                                                                                                                                                                                                                                                                                                                                                                                                                                                                                                                                                                                                                                                                                                                                                                                                                                                                                                                                                                                                                                                                     |
| Date Submitted by the Author: | 17-Apr-2021                                                                                                                                                                                                                                                                                                                                                                                                                                                                                                                                                                                                                                                                                                                                                                                                                                                                                                                                                                                                                                                                                                                                                                                                                                                                                                                                                                                                                                                                                                                                                                                                                                                                                                                                                                                                                                                                                                                                                                                                                                                                                                                                                                                                                                                                                                                                                                  |
| Complete List of Authors:     | <p>Mathews, Maria; Schulich School of Medicine and Dentistry Department of Family Medicine, Centre for Studies in Family Medicine</p> <p>Spencer, Sarah; Simon Fraser University, Faculty of Health Sciences</p> <p>Hedden, Lindsay ; Simon Fraser University, Faculty of Health Sciences; British Columbia Academic Health Science Network</p> <p>Marshall, Emily; Dalhousie University, Department of Family Medicine</p> <p>Lukewich, Julia; Memorial University of Newfoundland, Faculty of Nursing</p> <p>Meredith, Leslie; Schulich School of Medicine and Dentistry Department of Family Medicine, Centre for Studies in Family Medicine</p> <p>Ryan, Dana; Memorial University of Newfoundland, Faculty of Nursing</p> <p>Buote, Richard; Memorial University of Newfoundland, Faculty of Medicine</p> <p>Liu, Tiffany; Schulich School of Medicine and Dentistry Department of Epidemiology and Biostatistics</p> <p>Volpe, Emily; Schulich School of Medicine and Dentistry Department of Epidemiology and Biostatistics</p> <p>Gill, Paul; University of Toronto; Gateway Rural Health Institute</p> <p>Ryan, BL; Schulich School of Medicine and Dentistry Department of Family Medicine, Centre for Studies in Family Medicine; Schulich School of Medicine and Dentistry Department of Epidemiology and Biostatistics</p> <p>Schacter, Gordon; Schulich School of Medicine and Dentistry Department of Family Medicine</p> <p>Wickett, Jamie ; Schulich School of Medicine and Dentistry Department of Family Medicine</p> <p>Freeman, Thomas; Schulich School of Medicine and Dentistry Department of Family Medicine, Centre for Studies in Family Medicine</p> <p>Sibbald, Shannon; Western University Faculty of Health Sciences, School of Health Studies; Schulich School of Medicine and Dentistry Department of Family Medicine</p> <p>Wong, Eric; Schulich School of Medicine and Dentistry Department of Family Medicine; Thames Valley Family Health Team</p> <p>McKay, Maddi; Doctors Nova Scotia; Dalhousie University, Department of Family Medicine</p> <p>McCracken, Rita; Providence Health Care, Department of Family Medicine; University of British Columbia Faculty of Medicine, Family Practice</p> <p>Brown, Judith; Schulich School of Medicine and Dentistry Department of Family Medicine, Centre for Studies in Family Medicine</p> |

1  
2  
3  
4  
5  
6  
7  
8  
9  
10  
11  
12  
13  
14  
15  
16  
17  
18  
19  
20  
21  
22  
23  
24  
25  
26  
27  
28  
29  
30  
31  
32  
33  
34  
35  
36  
37  
38  
39  
40  
41  
42  
43  
44  
45  
46  
47  
48  
49  
50  
51  
52  
53  
54  
55  
56  
57  
58  
59  
60

|                                   |                                              |
|-----------------------------------|----------------------------------------------|
| <b>Primary Subject Heading:</b>   | Qualitative research                         |
| <b>Secondary Subject Heading:</b> | General practice / Family practice           |
| <b>Keywords:</b>                  | PRIMARY CARE, COVID-19, QUALITATIVE RESEARCH |
|                                   |                                              |

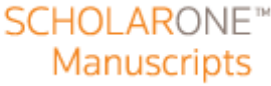



I, the Submitting Author has the right to grant and does grant on behalf of all authors of the Work (as defined in the below author licence), an exclusive licence and/or a non-exclusive licence for contributions from authors who are: i) UK Crown employees; ii) where BMJ has agreed a CC-BY licence shall apply, and/or iii) in accordance with the terms applicable for US Federal Government officers or employees acting as part of their official duties; on a worldwide, perpetual, irrevocable, royalty-free basis to BMJ Publishing Group Ltd ("BMJ") its licensees and where the relevant Journal is co-owned by BMJ to the co-owners of the Journal, to publish the Work in this journal and any other BMJ products and to exploit all rights, as set out in our [licence](#).

The Submitting Author accepts and understands that any supply made under these terms is made by BMJ to the Submitting Author unless you are acting as an employee on behalf of your employer or a postgraduate student of an affiliated institution which is paying any applicable article publishing charge ("APC") for Open Access articles. Where the Submitting Author wishes to make the Work available on an Open Access basis (and intends to pay the relevant APC), the terms of reuse of such Open Access shall be governed by a Creative Commons licence – details of these licences and which [Creative Commons](#) licence will apply to this Work are set out in our licence referred to above.

Other than as permitted in any relevant BMJ Author's Self Archiving Policies, I confirm this Work has not been accepted for publication elsewhere, is not being considered for publication elsewhere and does not duplicate material already published. I confirm all authors consent to publication of this Work and authorise the granting of this licence.

**TITLE PAGE**

**Title** Development of a Primary Care Pandemic Plan Informed by In-depth Policy Analysis and Interviews with Family Physicians across Canada During COVID-19: A Qualitative Case Study Protocol

**Authors**

Maria Mathews<sup>1</sup>, Sarah Spencer<sup>2</sup>, Lindsay Hedden<sup>2,3</sup>, Emily Gard Marshall<sup>4</sup>, Julia Lukewich<sup>5</sup>, Leslie Meredith<sup>1</sup>, Dana Ryan<sup>5</sup>, Richard Buote<sup>6</sup>, Tiffany Liu<sup>7</sup>, Emily Volpe<sup>7</sup>, Paul S Gill<sup>8,9</sup>, Bridget Ryan<sup>1,7</sup>, Gordon Schacter<sup>1</sup>, Jamie Wickett<sup>1</sup>, Thomas R Freeman<sup>1</sup>, Shannon L Sibbald<sup>1,10</sup>, Eric Wong<sup>1,11</sup>, Maddi McKay<sup>4,12</sup>, Rita McCracken<sup>13,14</sup>, Judith Belle Brown<sup>1</sup>

**Institutional affiliations**

1. Schulich School of Medicine and Dentistry Department of Family Medicine | London, Canada
2. Simon Fraser University Faculty of Health Sciences | Burnaby, Canada
3. British Columbia Academic Health Science Network | Vancouver, Canada
4. Dalhousie University Department of Family Medicine | Halifax, Canada
5. Memorial University Faculty of Nursing | St John's, Canada
6. Memorial University Faculty of Medicine | St John's, Canada
7. Schulich School of Medicine and Dentistry Department of Epidemiology and Biostatistics | London, Canada
8. University of Toronto | Goderich, Canada
9. Gateway Rural Health Institute | Goderich, Canada
10. Western University Faculty of Health Sciences | London, Canada
11. Thames Valley Family Health Team | London, Canada
12. Doctors Nova Scotia | Dartmouth, Canada
13. University of British Columbia Faculty of Medicine | Vancouver, Canada
14. Providence Health Care Department of Family Medicine | Vancouver, Canada

**Correspondence to** Dr Maria Mathews

Centre for Studies in Family Medicine  
The Western Centre for Public Health and Family Medicine, 2nd Floor  
London, Ontario, Canada, N6A 3K7  
maria.mathews@schulich.uwo.ca

**Word Count** 3999

## ABSTRACT

**Introduction** Given the recurrent risk of respiratory illness-based pandemics, and the important roles family physicians play during public health emergencies, the development of pandemic plans for primary care are imperative. Existing pandemic plans in Canada, however, do not adequately incorporate family physicians' roles and perspectives. This policy and planning oversight has become increasingly evident with the emergence of the novel coronavirus disease, COVID-19, pandemic. This study is designed to inform the development of pandemic plans for primary care through evidence from four provinces in Canada: British Columbia, Newfoundland and Labrador, Nova Scotia, and Ontario.

**Methods and analysis** We will employ a multiple case study of regions in four provinces. Each case consists of a mixed-methods design comprised of: (1) a chronology of family physician roles in the COVID-19 pandemic response; (2) a provincial policy analysis; and (3) qualitative interviews with family physicians. Relevant policy and guidance documents will be identified through targeted, snowball, and general search strategies. Additionally, these policy documents will be analysed to identify gaps and/or emphases in existing policies and policy responses. Interviews will explore family physicians' proposed, actual, and potential roles during the pandemic, the facilitators and barriers they have encountered throughout, and the influence of gender on their professional roles. Data will be thematically analysed using a content analysis framework, first at the regional level and then through cross-case analyses.

**Ethics and dissemination** Approval for this study has been granted by Research Ethics of British Columbia, the Health Research Ethics Board of Newfoundland and Labrador, Nova Scotia Health Authority Research Ethics Board, and Western University Research Ethics Board. Findings will be disseminated via conferences and peer-reviewed publications. Evidence and lessons learned will be used to develop tools for government ministries, public health units, and family physicians for improved pandemic response plans for primary care.

**Keywords** Qualitative Research; Research Design; Physicians, Primary Care; Physicians, Family; Pandemics; COVID-19



### Strengths and Limitations

- Our interdisciplinary research team includes experienced primary care researchers, family physicians and public health experts, allowing us to draw upon their expert knowledge in the development of study tools and the interpretation and dissemination of findings.
- The use of a multiple-case study approach will aid in making distinctions between localised issues specific to a single case and cross-cutting themes present across health regions.
- While maximum variation sampling will facilitate the recruitment of participants along a wide variety of characteristics in the selected regions and provinces, the transferability of findings may be limited by provincial variation in primary care and health policy in Canada.
- We anticipate this study will highlight gaps in current pandemic response plans and identify promising practices and key facilitators to incorporate in future pandemic response plans for family physicians.

## INTRODUCTION

Family physicians have an important role to play during a pandemic, with responsibilities including sentinel surveillance, screening, testing, health education, monitoring individuals and providing follow-up care, contributing to hospital and emergency room surge capacity, and providing vaccinations.[1–5] Additionally, family physicians are expected to continue providing routine primary care to individuals through their community-based practices.[4–6] Community members who are particularly reliant on primary care to maintain their health under normal circumstances may have increased care needs during and following a pandemic.[7]

There are attributes of family practice that call for clear, well-considered pandemic preparedness plans specific to primary care. Family physicians may be the first point of contact in a community-based outbreak. This requires that family physicians deal with new diseases when there is limited information about those diseases, such as their means of transmission, effective prevention practices, and therapeutic options.[8] Family physicians must also minimise the potential risk of transmission to other community members, staff, and trainees in their clinics, as well as themselves and their families.[9]

In December 2019, the severe acute respiratory syndrome coronavirus 2 (SARS-CoV-2) which causes COVID-19 appeared in China. On 30 January 2020, the World Health Organisation determined COVID-19 to be a public health emergency of international concern, and on 11 March 2020 they declared a pandemic.[10]

Canada confirmed its first presumptive case of COVID-19 on 25 January 2020.[11] Since then, the pandemic has been experienced differently across and within provinces. Nationally, there have been two distinct ‘waves’ of COVID-19 cases to date. The first ‘wave’, from April to June, peaked in May at nearly 70 new daily cases per million people; the second ‘wave’, which started in September 2020, has seen cases increase nationally to nearly 120 new daily cases per million people in November.[12] While some provinces have, to varying degrees, followed the national trend (e.g., British Columbia, Ontario, Quebec), others have avoided large first (e.g., Manitoba, Saskatchewan) or second (e.g., Newfoundland and Labrador, Nova Scotia) waves.[12]

1  
2  
3  
4  
5  
6  
7  
8  
9  
10  
11  
12  
13  
14  
15  
16  
17  
18  
19  
20  
21  
22  
23  
24  
25  
26  
27  
28  
29  
30  
31  
32  
33  
34  
35  
36  
37  
38  
39  
40  
41  
42  
43  
44  
45  
46  
47  
48  
49  
50  
51  
52  
53  
54  
55  
56  
57  
58  
59  
60

Healthcare delivery in Canada is within the jurisdiction of individual provinces, while the federal government has responsibilities for general public health guidance. Much of primary care across Canada is publicly funded through provincial health insurance while care is delivered through family physicians operating as private businesses.[13] Such provincial control facilitates contextualised responses while reinforcing provincially-varied experiences of a pandemic. This primary care model makes communication and coordination with practices challenging – particularly where physicians are not formally linked with regional or institutional networks.

In the early months of the COVID-19 pandemic in Canada, some family physicians were hesitant to screen community members in their clinics due to inadequate supplies of the appropriate personal protective equipment (PPE), improperly equipped examination rooms, and concerns regarding proper cleaning during clinic hours.[14] Eventually, designated COVID-19 assessment centres,[15,16] community-based PPE distribution,[17] and government control of supply chains [18] were implemented to address some of these concerns.

The prolonged nature of physical distancing and ‘stay-at-home’ orders have disrupted community primary care visits. Fewer community members sought primary care – either delaying or forgoing routine visits – and few individuals were willing to have in-person visits.[19] For fee-for-service practices, the decrease in service volumes reduced revenues, leaving some practices struggling to pay fixed overhead costs.[14,20–22]

Prior to the pandemic, virtual and telehealth services were only minimally offered by family physicians in Canada.[23] In response to the pandemic, synchronous virtual care has been adopted widely, facilitated by the introduction or modification of billing codes.[24] Because the need for virtual visits emerged so quickly, some physicians and community members have encountered barriers to adapting to this change due to a variety of factors such as technology and platform concerns, a lack of prior training in virtual clinical assessments and care, access to internet and private spaces, and the health literacy of individuals seeking care.[25]

Many family physicians also work in a variety of other healthcare settings that are directly affected by or involved in the pandemic response (e.g., hospitals, long-term care homes, non-profit community services).[14] Family physicians with institutional affiliations (e.g., hospital privileges) may be expected to add to surge capacity in these institutions, while other physicians may be redeployed to assessment and testing centres or to provide care beyond their traditional scope of practice.[26]

Outbreaks of COVID-19 in long-term care facilities prompted orders for residential caregivers to work in a single setting in some provinces,[27–29] though it is unclear how these orders will affect the roles of physicians as the pandemic proceeds. Family physicians, in particular those working in rural communities who provided care to multiple settings prior to the pandemic, may be particularly hard-pressed to operate community-based practices while meeting their obligations to hospitals and long-term care homes if they are limited to a single setting.

Finally, given that women make up a growing proportion of the family physician workforce,[30] and as caregiving roles evolve, pandemic plans struggled to incorporate gender considerations. Family physicians may care for children or older relatives and may therefore be unable or unwilling to participate in some or all pandemic roles due to a lack of care support, isolation protocols following exposure, and their desire to minimise exposure risk to their loved ones.

In the absence of clearly defined pandemic plans for primary care, it is uncertain how family physicians have informed their care provision and role fulfilment during the current pandemic. With multiple sources of information providing updates and guidance as the pandemic

1  
2  
3 unfolds, it is possible that family physicians may hold varied and potentially competing views on  
4 their responsibilities. Further, with minimal recent experience with primary care provision during  
5 a pandemic, policymakers have limited evidence of family physicians' professional and personal  
6 experiences with implementing the policies envisioned for them and their communities of care.  
7 As deployment of primary care and COVID-19 are provincial responsibilities, Canada offers a  
8 strong opportunity to conduct case studies comparing approaches and outcomes to inform future  
9 pandemic planning in primary care.  
10

11 In this study, we will draw upon the experiences of family physicians throughout the  
12 COVID-19 pandemic to guide the ongoing response to COVID-19 and develop primary care  
13 response plans for future pandemics. We anticipate this study will highlight gaps in current  
14 pandemic response plans; identify variation along traits such as urban/rural location, affiliation  
15 with regional organisational structures, funding models, and gender; and illustrate promising  
16 practices and key facilitators. The findings will help ensure physicians are supported to fulfil  
17 their roles during a pandemic and that community members' access to primary care is minimally  
18 disrupted throughout all stages of a pandemic.  
19  
20

## 21 Objectives

22 This research seeks to understand the formal and informal roles of family physicians during a  
23 pandemic, and the facilitators and barriers family physicians encounter in fulfilling those roles.  
24 Specifically, our objectives are to:  
25

- 26 1. describe the proposed, actual, and potential roles of family physicians during different  
27 stages of the COVID-19 pandemic;
- 28 2. describe the facilitators and barriers to the proposed, actual, and potential family  
29 physician roles during different stages of the COVID-19 pandemic;
- 30 3. describe gender differences in the roles, facilitators, and barriers of family physicians  
31 during different stages of the COVID-19 pandemic; and
- 32 4. compare and contrast the proposed, actual, and potential roles of family physicians and  
33 the facilitators and barriers to these family physician roles across four Canadian  
34 provinces.  
35

36 "Roles" in this context refers to specific tasks and/or responsibilities that family physicians are  
37 asked or required to perform during the stages of the pandemic. These roles are expected to cease  
38 once the pandemic is over and 'normal' operations resume.  
39  
40

## 41 METHODS

### 42 Overall Study design

43 This study is comprised of multiple mixed methods case studies,[31] with each case examining  
44 the pandemic response of family physicians in one of four regions of Canada: the Vancouver  
45 Coastal Health region in British Columbia, the Eastern Health Region of Newfoundland and  
46 Labrador, the province of Nova Scotia, and Ontario Health West Region.  
47  
48

49 Vancouver Coastal Health is one of five regional health authorities in British Columbia,  
50 providing care to a quarter of the provincial populace (1.25 million individuals) through primary,  
51 residential, and acute care, public health, mental health, and substance use programmes.[32] The  
52 Eastern Health Region is the largest of four regional health authorities in Newfoundland and  
53 Labrador, providing a full spectrum of health services to over half of the province's residents  
54 (more than 300,000 community members).[33] Nova Scotia Health provides a range of  
55 healthcare through hospitals, health centres, and community-based programmes to all (nearly one  
56  
57  
58  
59  
60

million) residents of the province of Nova Scotia, as well as some specialised services for Atlantic Canadians.[34] The Ontario Health West region includes the areas served by the four westernmost Local Health Integration Networks, which are responsible for coordination of primary, home, and community care, community health centres, hospitals, long-term care, and mental health and addictions support for roughly 2.6 million residents.[35] The newly formed Ontario Health West agency is coordinating the COVID-19 response in the region.[36] These regions, while pragmatically representing the locations of our pre-existing research team, have variation in their numbers of COVID-19 cases and deaths, include urban and rural communities, links to acute care, and represent varied regional structures and primary care funding and practice models that are characteristic of primary care models and reforms implemented across Canada.

Each case study will consist of a mixed-methods design, including: (1) a chronology of family physician roles in the COVID-19 pandemic response; (2) a provincial policy analysis; and (3) qualitative interviews with family physicians. We will compare and contrast findings across cases in order to identify comprehensive themes, shared lessons learned, and promising practices.

## **Chronology**

### **Approach**

Each provincial team will compile a chronology to describe key milestones in the COVID-19 pandemic and family physicians' roles and responsibilities in each pandemic stage. We will also identify policies that influenced how family physicians performed pandemic-related roles. A comprehensive document review of grey literature including federal, provincial, and regional health policy documents, government briefings and news reports, and policies and communications from health professional organisations (e.g., provincial colleges of physicians and surgeons and colleges of family medicine, Canadian Medical Association, College of Family Physicians of Canada), will be used to inform the chronology and a policy analysis.

Relevant documents will be identified using a combination of targeted and general search strategies. Through our targeted search, we will review government, public health and health professional organisation, health institution, and medical school websites throughout all four regions. These targeted websites will facilitate snowball searches of linked and/or referenced websites, documents, and resources. As part of a general search, we will conduct ongoing online searches using the following terms and logic: province or region name or abbreviation (e.g., "BC" or "British Columbia" or "VCH" or "Vancouver Coastal Health"); and "covid" or "COVID-19" or "coronavirus"; and "primary care" or "family physician" or "family doctor" or "general practitioner".

In the chronology, we will note the progression of the pandemic (e.g., number of cases, number of deaths); declarations, actions, and ministerial orders (e.g., declarations of a pandemic and/or public health emergency, closures, stay-at-home orders, essential work definitions, re-openings); and directives, supports, programmes, and guidance for community members, institutions, and healthcare workers. While the primary focus for each provincial study team will be their selected health region, we will also document pivotal milestones and policies at the provincial, national, and international levels to provide the appropriate context for the chronologies.

Chronologies will be verified by public health, family physicians, and primary care professionals in each region to ensure completeness, establish face validity, and identify missing

1  
2  
3 events or data sources. Provided that the project will take place throughout the current COVID-  
4 19 pandemic, the document review will be ongoing and verification will occur at multiple points  
5 in the study.

6 We will use the chronologies to identify the distinct stages in the pandemic response in  
7 each region and the proposed roles of family physicians outlined in pandemic plans and guiding  
8 documents. The chronology will be used as a common frame of reference in the qualitative  
9 interviews, helping to create an initial portrait of the actual role and reveal facilitators and  
10 barriers encountered by family physicians.  
11

## 12 **Policy analysis**

13 The document search, criteria, and review used to develop the regional chronologies will also  
14 form the basis for provincial policy analyses that will characterise the policies that have  
15 influenced family physicians throughout the pandemic. These analyses will identify gaps and  
16 emphases within pre-existing policies and supports and those that emerged in response to  
17 COVID-19.  
18

19 To be included in the policy analysis, a policy must relate (directly or indirectly) to the  
20 roles of family physicians and/or primary care practices at any point during the COVID-19  
21 pandemic. Policies may be pre-existing, a modification of existing policy, or new policy in  
22 response to the COVID-19 pandemic. The policy may apply to any sites where family physicians  
23 routinely work, including office-based care, long-term care, hospitals, home, or walk-in clinics,  
24 but must pertain specifically to family physicians or their practice staff and to activities at all  
25 locations (rather than a single location).  
26

27 Each policy from the chronology document review will be assessed for inclusion and  
28 coded according to the following:  
29

- 30 • the jurisdiction targeted by the policy (e.g., region, province, national, international, or  
31 other);
- 32 • the reported start and end date (where applicable) of the policy;
- 33 • the pandemic stage when the policy was issued;
- 34 • a summary of the policy, including a description of the corresponding family physician  
35 role to which the policy relates;
- 36 • the type of organisation issuing the policy (e.g., government, public health agency,  
37 medical professional association, health region/institution) and the level at which the  
38 organisation operates (e.g., international, national, provincial, regional);
- 39 • the level of the policy's application (e.g., international, national (i.e., to all Canadian  
40 residents), provincial (i.e., to all resident of a province) etc.); and
- 41 • the type of policy instrument: 'do nothing', 'exhortation', 'expenditure', 'regulation', and  
42 'public ownership'.<sup>[37]</sup>  
43

44 Each policy will be coded using a Qualtrics (SAP Software Solutions) survey. An initial set of  
45 twenty policies (five from each case) will be selected randomly and completed by all coders to  
46 identify additional codes, coding categories, to clarify instructions, ensure consistent application  
47 of procedures, and resolve any coding disputes. Frequencies and cross-tabulations will be  
48 derived to describe the types of policy instruments issued in each jurisdiction, by different  
49 organisations, and to support the different roles of family physicians.  
50

## 51 **Qualitative interviews**

52 Following the development and verification of initial provincial chronologies and in parallel with  
53 the policy analysis, we will conduct semi-structured qualitative interviews with family  
54

1  
2  
3 physicians working in each study region. Interviews will be 45 to 60 minutes in length and, due  
4 to the ongoing COVID-19 pandemic, will be conducted by Zoom (Zoom Video Communications  
5 Inc.) or telephone, depending on participant preference. With the permission of participants,  
6 interviews will be audio-recorded and transcribed verbatim and notes will be taken for analysis.  
7

8 For each interview, participants will be provided a copy of the region-specific chronology  
9 and we will ask that they describe for each pandemic stage: the facilitators and barriers they  
10 experienced in performing the proposed roles outlined in the chronology; their actual role and the  
11 facilitators and barriers they encountered in its fulfilment; the potential roles that family  
12 physicians could have filled at each stage of the pandemic, as well as the facilitators and barriers  
13 to fulfilment; and how their gender influences their proposed, actual, and potential roles as  
14 family physicians during the pandemic. Interviews will involve background questions on  
15 participants' gender, years of practice, work settings, clinic roles, and the demographics of their  
16 practice populations.  
17

18 Given the dynamic nature of the pandemic and the evolving roles of family physicians,  
19 and that data collection will be ongoing as the pandemic persists, each participant will be asked  
20 if we may contact them for a potential second interview of a similar format.  
21

## 22 Study sample and recruitment

23  
24 Consistent with maximum variation sampling,[38] we will recruit family physicians along a wide  
25 range of characteristics, such as family physicians with and without an academic appointment, of  
26 different genders, from different primary care funding and practice models, with and without  
27 team/regional health authority affiliations, and with varied community demographics. We  
28 anticipate recruiting approximately 24 to 30 physicians in each region (around 120 overall);  
29 however, we will continue recruiting until we have sufficient data to allow for rigorous analysis  
30 and to accurately represent the experiences of family physicians with shared characteristics as  
31 noted above (i.e., saturation).  
32

33 To be included in the study, family physicians must have been licensed to practice in  
34 2020 and be either clinically active or eligible to be clinically active in the applicable region of  
35 the study province during the pandemic. Eligibility to be clinically active is intended to include  
36 participants who may have changed their work plans in response to the pandemic (e.g., return  
37 from parental, medical, or other types of leave or travel). We will include family physicians who  
38 work solely in institutional settings, including long-term care facilities and hospitals.  
39

40 We will exclude post-graduate medical residents, as well as international medical  
41 graduates permitted to practice solely during the pandemic since the latter's roles may be  
42 influenced by educational or licensing policies. Physicians in solely academic, research, or  
43 administrative roles will also be excluded.  
44

45 To recruit family physicians, a research assistant will email or fax a study invitation to  
46 prospective participants providing information about the study and requesting their participation  
47 in an interview. Family physicians will be identified through faculty lists, lists of teams and  
48 practices (e.g., family health teams, community health centres), privileging lists, and provincial  
49 College of Physicians and Surgeons' physician search portals. Due to provincial variance in  
50 access to lists of family physicians, we will also advertise through professional organisations'  
51 newsletters, social media posts, and employ third-party recruitment (i.e., snowballing). In the  
52 case of snowballing, we will encourage participants to share our study and contact information  
53 with their professional networks, allowing interested physicians to initiate contact with the study  
54 team to obtain further details, confirm eligibility, and schedule an interview.  
55  
56  
57

## Analysis

The interview recordings will be transcribed verbatim, proofread, and validated for accuracy with the participants as necessary. Field notes will also be taken during interviews by the researchers. All data will be thematically analysed for themes related to the research objectives using a content analysis framework. Employing a comparative analysis approach, at least two members of the research team will independently read each transcript and the interviewer's corresponding notes to identify key themes and develop a robust coding framework around which further analysis will be structured.[39,40] A codebook will be developed to list and define all codes, to aid in the consistency of their application.

Through subsequent iterations of the coding process, we will move from more descriptive to more analytic codes, developing broader conceptual themes from the interview data. The researchers will determine codes for all data and harmonise the key themes. Analysis of transcripts will then be conducted using NVivo 12 (QSR International) software for qualitative data analysis.[39,40] Descriptive statistics will be extracted from the demographic data and used to summarise the characteristics of the study participants.

## Cross-case analysis

As results from each regional case – including chronology, policy analysis and interviews – emerge, we will compare and contrast findings across cases to identify comprehensive themes, shared lessons learned, and promising practices. The use of a multiple-case study approach facilitates the distinction between localised issues specific to a single case and cross-cutting themes present across multiple health regions.[31] Given the differences in primary healthcare systems across Canadian provinces, cross-case analyses will also allow us to examine plausible or rival explanations by contrasting responses and exploring varying contextual conditions in the four cases.

## Study rigour

To enhance the rigour of this multiple-case study, we will draw upon evidence gathered in the chronology, policy analysis, and qualitative interviews which will be conducted using consistent methods across all four cases.[31,41] We will prepare interview guides and pre-test questions, document our interviewing and transcription protocols, use experienced interviewers, and member-check with the participants during interviews. Further, our interdisciplinary team includes family physicians and public health experts, allowing us to draw on prior expert knowledge in the development of our research tools and the interpretation of our results.[31]

The research will also be conducted and presented in accordance with the consolidated criteria for reporting qualitative research (COREQ).[42] We will keep detailed records of the interviews (i.e., audio recordings, transcripts), field notes, drafts of the coding template, and document coding disagreements and their resolutions. We will look for negative cases and encourage and document self-reflection among all members of the research team. In our dissemination of findings, we will provide thick descriptions[43] and use illustrative quotes.

## Patient or public involvement

Neither patients nor the public have been involved in the development of this research.

## ETHICS AND DISSEMINATION

### Ethics approval

9

1  
2  
3 We have obtained approval from the research ethics boards at Simon Fraser University and the  
4 University of British Columbia (through harmonised Research Ethics of British Columbia), the  
5 Health Research Ethics Board of Newfoundland and Labrador, Nova Scotia Health, and the  
6 University of Western Ontario.  
7

### 8 **Informed consent**

9

10 The research coordinator will contact interested participants by email or fax, provide them with  
11 study information and the study consent form, and ask them to complete and return the form. The  
12 research coordinator and principal investigator in each region are available to answer any  
13 questions and will only proceed with an interview once written consent has been received.  
14 Individuals may refuse to participate, refuse to answer any questions, or withdraw from the study  
15 at any point up until their data have been combined with other participants' for analysis.  
16 Participants do not waive any legal rights by signing the consent form.  
17

### 18 **Confidentiality**

19

20 All measures will be taken to reduce the risk of a privacy breach and maintain participant  
21 confidentiality. Audio recordings will be kept on secure storage provided by the affiliated  
22 academic institutions until they have been transcribed and the transcripts verified by the  
23 interviewer and/or participant.  
24

25 Participants' full name and contact information will be used to schedule their interview  
26 and additional demographic information, such as gender and type of practice will be used to  
27 ensure variation in interview participants, however this information will be kept separate from  
28 audio files and transcribed interviews by using unique participant codes. The master list of  
29 participants' names and their unique codes will be kept separate from study data and will not be  
30 shared with other regional study teams. All other identifying information that may be mentioned  
31 will be obscured during the transcription process. Participants' names will not be used in any  
32 published findings.  
33

### 34 **Knowledge translation**

35

36 In alignment with an integrated knowledge translation model,[44] this project was motivated by  
37 conversations with physicians and health system administrators during the early stages of the  
38 pandemic. Family physicians voiced questions and concerns about implementing guidelines from  
39 local public health organisations and emphasised the necessity of a coordinated pandemic  
40 response plan for primary care. To maintain this integration of knowledge users throughout the  
41 study, and to ensure that our data collection, analysis, and dissemination is reflective of family  
42 physicians' perspectives and information needs, our team includes community-based family  
43 physicians as co-investigators and collaborators within each region.  
44

45 We will disseminate our findings throughout the twelve-month project. Emergent  
46 findings will be shared through the communication channels (e.g., websites, newsletters) of the  
47 four principal investigators and through our study team's knowledge user and collaborator  
48 partners. Results will provide government ministries, public health units, other health  
49 organisations, and family physicians with evidence and tools to better inform their ongoing and  
50 future pandemic responses. We will prepare articles for publication in peer-reviewed open-access  
51 journals, write op-eds, conduct media interviews, participate in online discussions (e.g.  
52 healthydebate.ca), and employ social media. We will also share findings through regional,  
53 national, and international conferences both virtually and in-person, once current pandemic-  
54 related travel restrictions are lifted.  
55  
56  
57



1  
2  
3  
4 Although, there are many other healthcare providers in primary healthcare, this study  
5 focuses on family physicians because physician-led practices remain the most prevalent form of  
6 primary healthcare organisation in Canada. Similarly, we recognise that our project is a single,  
7 albeit important, step in the creation of primary care pandemic preparedness plans which will  
8 ultimately require the engagement of a broader range of health professionals, and government,  
9 professional, and regional organisations.  
10

11 **Acknowledgments** Many thanks to our study participants for sharing their time and experiences  
12 with us while continuing to provide care to their communities throughout the ongoing COVID-  
13 19 pandemic. Thanks, as well, to Shabnam Asghari, Kris Aubrey-Bassler, Caitlyn Ayn, Erin  
14 Christian, Catherine Faulds, Le Gao, Rick Gibson, George Kim, Aimee Letto, Lauren Mauritz,  
15 Steve Slade, Nardia Strydom, Alex Summers, Amanda Terry, Amardeep Thind, Robert  
16 Thompson, Steve Wetmore, and Jennifer Young for their expertise and insights in the  
17 development of this study protocol and their ongoing support of the Pandemic Planning for  
18 Primary Care study.  
19  
20

21 **Author contributions** The first author named is lead and corresponding author. Contributions  
22 to the paper are described using the CRediT taxonomy (*Brand et al. (2015), Learned Publishing*  
23 *28(2)*). Writing – Original Draft: MM, SS; Writing – Review and Editing: SS, LH, MM, JL,  
24 EGM, LM, DR, RB, TL, EV, SLS, RM, MM, TRF, EW, JBB, PSG, BR, GS, JW;  
25 Conceptualisation: MM, LH, EGM, JL; Methodology: MM, LH, EGM, JL, LM, SS, RB, DR,  
26 TL, EV, SLS, RM, MM, TRF, EW, JBB, PSG, BR, GS, JW; Supervision: MM, LH, EGM, JL;  
27 Project Administration: MM, LM, LH, SS, EGM, JL, RB, DR; Funding Acquisition: MM, LH,  
28 EGM, JL. All authors have read and approved the final manuscript.  
29  
30

31 **Funding** This study is funded by a grant from the Canadian Institutes for Health Research  
32 (VR41 72756).  
33  
34

35 **Competing interests** None declared.  
36  
37

38 **Ethics approval** This study has been approved by the Western University Research Ethics  
39 Board (Project ID 116315), Nova Scotia Health Authority Research Ethics Board (File No.  
40 1026085), Research Ethics British Columbia (No. H20-02998), and Health Research Ethics  
41 Board of Newfoundland and Labrador (No. 2020.251).  
42  
43

44 **Patient consent for publication** Not required.  
45

46 **Provenance and peer review** Not commissioned; externally peer reviewed.  
47

48 **Data availability** Datasets have not yet been generated or analysed for this study and are  
49 therefore not available.  
50  
51  
52  
53  
54  
55  
56  
57

## REFERENCES

1. Mazowita G. Role for primary care in epidemic surge capacity. *Can Fam Physician*. 2006;52:951.
2. Vancouver Coastal Health. The Regional Pandemic Outbreak Response Plan. Vancouver: Vancouver Coastal Health; 2018 Sep. Available from: <https://sneezediseases.com/assets/uploads/1578342909B2QYPNFREK5cN5EDsglaGYPKRX9A.pdf>
3. Public Health Agency of Canada. COVID-19 pandemic guidance for the health care sector. 2020 [cited 2020 Nov 6]. Available from: <https://www.canada.ca/en/public-health/services/diseases/2019-novel-coronavirus-infection/health-professionals/covid-19-pandemic-guidance-health-care-sector.html#a322>
4. Ministry of Health. Planning Guide for Respiratory Pathogen Season. Toronto: Government of Ontario; 2019 Oct. Available from: [http://www.health.gov.on.ca/en/pro/programs/publichealth/flu/docs/planning\\_guide\\_rps.pdf](http://www.health.gov.on.ca/en/pro/programs/publichealth/flu/docs/planning_guide_rps.pdf)
5. Public Health Agency of Canada. Canadian pandemic influenza preparedness: planning guidance for the health sector. 2018. Available from: [http://epe.lac-bac.gc.ca/100/201/301/weekly\\_acquisitions\\_list-ef/2019/19-06/publications.gc.ca/collections/collection\\_2019/aspc-phac/HP40-144-2018-eng.pdf](http://epe.lac-bac.gc.ca/100/201/301/weekly_acquisitions_list-ef/2019/19-06/publications.gc.ca/collections/collection_2019/aspc-phac/HP40-144-2018-eng.pdf)
6. Harvey BJ. The issue of public health. *Can Fam Physician*. 2009;55:1057.
7. Runkle JD, Brock-Martin A, Karmaus W, Svendsen ER. Secondary Surge Capacity: A Framework for Understanding Long-Term Access to Primary Care for Medically Vulnerable Populations in Disaster Recovery. *Am J Public Health*. 2012;102:e24–32.
8. Hogg W, Huston P, Martin C, Saginur R, Newbury A, Vilis E, et al. Promoting best practices for control of respiratory infections. *Can Fam Physician*. 2006;52:1110–6.
9. Provincial Infection Control Network of British Columbia. Infection Prevention and Control Guidelines for Providing Healthcare to Clients Living in the Community. Vancouver: Provincial Health Services Authority; 2014 Jun. Available from: [https://www.picnet.ca/wp-content/uploads/PICNet\\_Home\\_and\\_Community\\_Care\\_Guidelines\\_2014\\_.pdf](https://www.picnet.ca/wp-content/uploads/PICNet_Home_and_Community_Care_Guidelines_2014_.pdf)
10. World Health Organisation. Timeline of WHO’s response to COVID-19. World Health Organ. 2020 [cited 2020 Nov 10]. Available from: <https://www.who.int/news/item/29-06-2020-covidtimeline>
11. Nasser S, Blum B. Canada’s 1st ‘presumptive’ case of coronavirus found in Toronto. *CBC News*. 2020 Jan 25 [cited 2020 Nov 10]; Available from: <https://www.cbc.ca/news/canada/toronto/canada-1st-case-coronavirus-toronto-1.5440760>

12. Provincial Health Service Authority. BCCDC COVID-19 Canadian and Global Epidemiology. 2020 [cited 2020 Nov 17]. Available from: [https://bccdc.shinyapps.io/covid19\\_global\\_epi\\_app/](https://bccdc.shinyapps.io/covid19_global_epi_app/)
13. Hutchison B, Levesque J-F, Strumpf E, Coyle N. Primary Health Care in Canada: Systems in Motion. *Milbank Q*. 2011;89:256–88.
14. Lemire F, Slade S. Reflections on family practice and the pandemic first wave. *Can Fam Physician*. 2020;66:468.
15. Butler C. Here’s what it’s like inside London’s first COVID-19 assessment centre. *CBC News*. 2020 Mar 17 [cited 2020 Nov 3]; Available from: <https://www.cbc.ca/news/canada/london/london-ontario-covid-19-assessment-1.5500499>
16. Daflos P. Metro Vancouver cities identifying facilities for makeshift hospitals and COVID-19 testing sites. *CTV News*. 2020 Mar 26; Available from: <https://bc.ctvnews.ca/metro-vancouver-cities-identifying-facilities-for-makeshift-hospitals-and-covid-19-testing-sites-1.4870503>
17. Shah M, Ho J, Zhong A, Fung M, Elia M, Dang J, et al. In a Time of Need: A Grassroots Initiative in Response to PPE Shortage in the COVID-19 Pandemic. *Healthc Q*. 2020;23:9–15.
18. Hunter J, Bailey I. B.C. assumes power to take over supply chains amid COVID-19. *Globe Mail*. Online. Victoria and Vancouver; 2020 Mar 26 [cited 2020 Oct 11]; Available from: <https://www.theglobeandmail.com/canada/british-columbia/article-bc-assumes-power-to-take-over-supply-chains-amid-covid-19/>
19. Daflos P. ‘The lights are on’: B.C. doctors encourage cautious public to seek medical care when needed. *CTV News*. 2020 Apr 7 [cited 2020 Nov 10]; Available from: <https://bc.ctvnews.ca/the-lights-are-on-b-c-doctors-encourage-cautious-public-to-see-medical-care-when-needed-1.4887569>
20. Pimlott N. Hope in a global pandemic. *Can Fam Physician*. The College of Family Physicians of Canada; 2020;66:312.
21. Farooqui S. Doctors’ association says help from government not enough to survive COVID-19. *CBC News*. 2020 Apr 19 [cited 2020 Nov 3]; Available from: <https://www.cbc.ca/news/canada/toronto/covid-ontario-doctors-1.5537919>
22. Quinn M. N.L. arranges financial relief for doctors signing up to fight COVID-19. *CBC News*. 2020 Apr 15 [cited 2020 Nov 3]; Available from: <https://www.cbc.ca/news/canada/newfoundland-labrador/covid19-newfoundland-doctors-pay-1.5531536>
23. Bhatia RS, Falk W. Modernizing Canada’s Healthcare System Through the Virtualization of Services. *CD Howe Inst E-Brief*. 2018 [cited 2020 Nov 17]; Available from: <https://www.ssrn.com/abstract=3184876>

- 1  
2  
3 24. CIHI. Physician billing codes in response to COVID-19. *Can. Inst. Health Inf.* 2020 [cited  
4 2020 Nov 17]. Available from: [https://www.cihi.ca/en/physician-billing-codes-in-response-to-](https://www.cihi.ca/en/physician-billing-codes-in-response-to-covid-19)  
5 covid-19  
6
- 7 25. Glauser W. Virtual care is here to stay, but major challenges remain. *Can Med Assoc J.*  
8 2020;192:E868-9.  
9
- 10 26. Oetter HM. COVID-19: Important update regarding scope of practice. *Coll. Physicians Surg.*  
11 *Br. Columbia.* 2020 [cited 2020 Oct 9]. Available from: [https://www.cpsbc.ca/files/pdf/2020-03-](https://www.cpsbc.ca/files/pdf/2020-03-30-COVID-19-Update-regarding-scope-of-practice.pdf)  
12 30-COVID-19-Update-regarding-scope-of-practice.pdf  
13  
14
- 15 27. Lysyshyn M. Recommendations to reduce the risk of COVID-19 in licensed residential care  
16 facilities (other than Long-Term Care Facilities for seniors). Vancouver Coastal Health; 2020  
17 [cited 2020 Oct 22]. Available from:  
18 [https://sneezediseases.com/assets/uploads/1587064011T3cj0AB3hl0pbFIRTSoa1MdP7RFY.pd](https://sneezediseases.com/assets/uploads/1587064011T3cj0AB3hl0pbFIRTSoa1MdP7RFY.pdf)  
19 [f](https://sneezediseases.com/assets/uploads/1587064011T3cj0AB3hl0pbFIRTSoa1MdP7RFY.pdf)  
20  
21
- 22 28. Minister of Public Safety and Solicitor General. Order of the Minister of Public Safety and  
23 Solicitor General, Emergency Program Act - Ministerial Order No. M105. Government of  
24 British Columbia; 2020 [cited 2020 Oct 1]. Available from:  
25 [https://www2.gov.bc.ca/assets/gov/public-safety-and-emergency-services/emergency-](https://www2.gov.bc.ca/assets/gov/public-safety-and-emergency-services/emergency-preparedness-response-recovery/gdx/orders-april-10/ep_act_order_m105-2020_single_site.pdf)  
26 preparedness-response-recovery/gdx/orders-april-10/ep\_act\_order\_m105-2020\_single\_site.pdf  
27  
28
- 29 29. CBC News. Ontario to stop caregivers from working at multiple long-term care homes as  
30 COVID-19 spreads like 'wildfire'. *CBC News.* 2020 Apr 14 [cited 2020 Nov 3]; Available from:  
31 [https://www.cbc.ca/news/canada/toronto/ontario-to-stop-caregivers-from-working-at-multiple-](https://www.cbc.ca/news/canada/toronto/ontario-to-stop-caregivers-from-working-at-multiple-long-term-care-homes-as-covid-19-spreads-like-wildfire-1.5531920)  
32 long-term-care-homes-as-covid-19-spreads-like-wildfire-1.5531920  
33
- 34 30. Hedden L, Barer ML, Cardiff K, McGrail KM, Law MR, Bourgeault IL. The implications of  
35 the feminization of the primary care physician workforce on service supply: a systematic review.  
36 *Hum Resour Health.* 2014 [cited 2020 Nov 3];12. Available from: [https://human-resources-](https://human-resources-health.biomedcentral.com/articles/10.1186/1478-4491-12-32)  
37 health.biomedcentral.com/articles/10.1186/1478-4491-12-32  
38  
39
- 40 31. Yin RK. *Case study research: design and methods.* 5th ed. Los Angeles: SAGE Publications;  
41 2014.  
42
- 43 32. Vancouver Coastal Health. About us. *Vanc. Coast. Health.* 2020 [cited 2020 Nov 17].  
44 Available from: <http://www.vch.ca/about-us>  
45
- 46 33. Eastern Health. About Us. *East. Health Nfld. Labrador.* 2019 [cited 2020 Nov 17]. Available  
47 from: <http://www.easternhealth.ca/AboutEH.aspx>  
48  
49
- 50 34. Nova Scotia Health Authority. About Us. 2020 [cited 2020 Nov 24]. Available from:  
51 <http://www.nshealth.ca/about-us>  
52
- 53 35. Government of Ontario. Ontario Taking Next Steps to Integrate Health Care System. 2019  
54 [cited 2020 Dec 4]. Available from: [https://news.ontario.ca/en/release/54585/ontario-taking-](https://news.ontario.ca/en/release/54585/ontario-taking-next-steps-to-integrate-health-care-system)  
55 next-steps-to-integrate-health-care-system  
56  
57

- 1  
2  
3 36. Ontario Health. New Health System COVID-19 Response Structure. Government of Ontario;  
4 2020 [cited 2020 Dec 4]. Available from:  
5 [https://www.wrh.on.ca/uploads/Coronavirus/MEMO\\_New\\_Health\\_Response\\_Structure.pdf](https://www.wrh.on.ca/uploads/Coronavirus/MEMO_New_Health_Response_Structure.pdf)  
6  
7  
8 37. Deber RB, Mah CL. Case Studies in Canadian Health Policy and Management. 2nd ed.  
9 Toronto: University Of Toronto Press; 2014.  
10  
11 38. Creswell JW. Research design: qualitative, quantitative, and mixed methods approaches. 4th  
12 ed. Thousand Oaks: SAGE Publications; 2014.  
13  
14 39. Berg BL. Qualitative research methods for the social sciences. 2nd ed. Boston: Allyn and  
15 Bacon; 1995.  
16  
17 40. Guest G. Applied thematic analysis. Thousand Oaks: SAGE Publications; 2012.  
18  
19 41. Creswell JW. Qualitative inquiry and research design: choosing among five approaches. 3rd  
20 ed. Los Angeles: SAGE Publications; 2013.  
21  
22 42. Tong A, Sainsbury P, Craig J. Consolidated criteria for reporting qualitative research  
23 (COREQ): a 32-item checklist for interviews and focus groups. *Int J Qual Health Care*.  
24 2007;19:349–57.  
25  
26 43. Green J, Thorogood N. Qualitative Methods for Health Research. 4th ed. London: SAGE  
27 Publications; 2018.  
28  
29 44. Graham ID, Logan J, Harrison MB, Straus SE, Tetroe J, Caswell W, et al. Lost in knowledge  
30 translation: Time for a map? *J Contin Educ Health Prof*. 2006;26:13–24.  
31  
32  
33  
34  
35  
36  
37  
38  
39  
40  
41  
42  
43  
44  
45  
46  
47  
48  
49  
50  
51  
52  
53  
54  
55  
56  
57  
58  
59  
60
